# Supplementary material for: Quantitative HPLC-ICP-MS analysis of antimonyredox speciation in complex sample matrices: new insights into the Sb-chemistry causing poor chromatographic recoveries
Source: Royal Society of Chemistry journal article supplement (doi:10.1039/c0an00796j), 2010-12-14
Supplement: c0an00796j.pdf [file c0an00796j.pdf]

Supplementary material for “**Quantitative HPLC-ICP-MS analysis of antimony redox speciation in complex sample matrices: New insights into the Sb-chemistry causing poor chromatographic recoveries**”

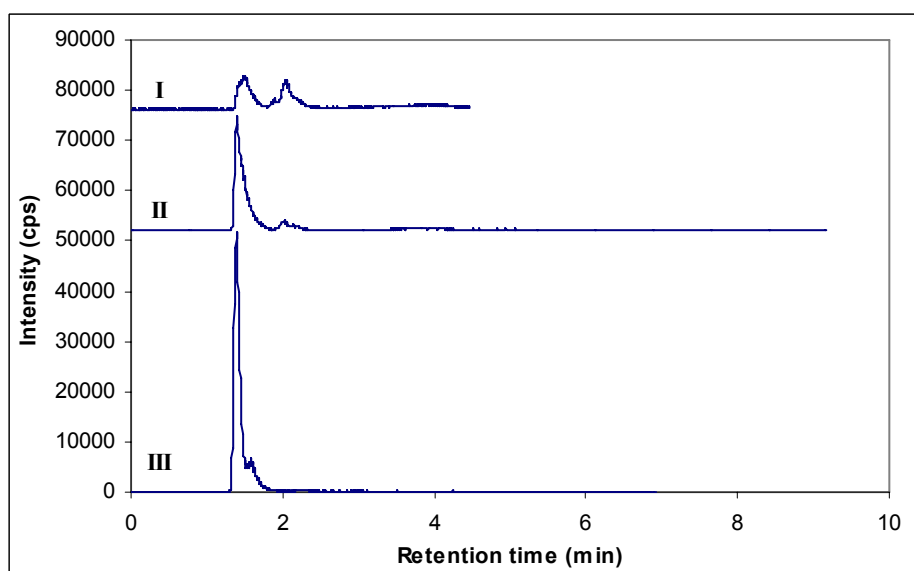

Figure i: HPLC-ICP-MS chromatogram of Pentostam freshly diluted (I), diluted 3½ h prior to injection (II) or diluted in 1 M HCl and 30 mM EDTA 4 h prior to chromatography (III). Mobile phase: 20 mM EDTA and 2 mM phthalic acid pH 4.5 (A).

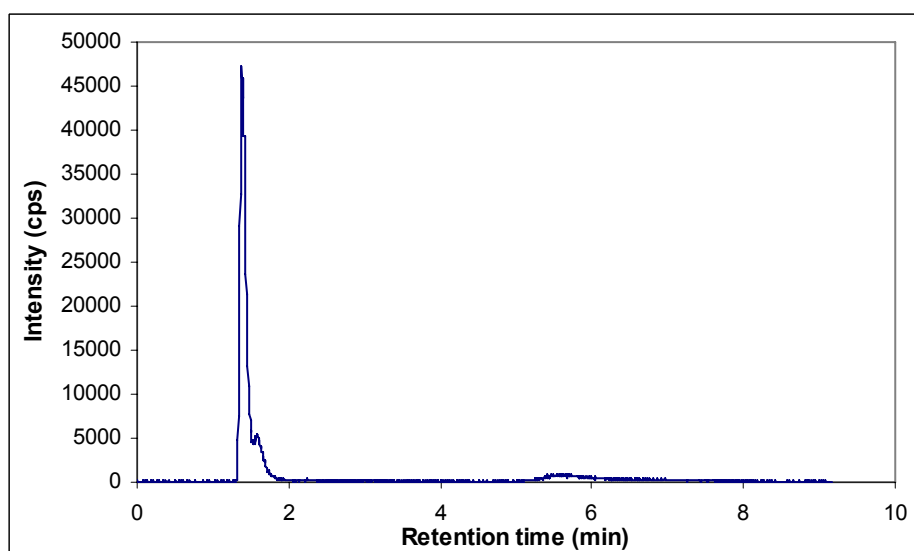

Figure ii: HPLC-ICP-MS chromatogram of Sb(V)-adenosine mixture after 3½ of treatment with 1 M HCl and 30 mM EDTA. At 5.6 minutes a flat peak elutes. Mobile phase: 20 mM EDTA+ 2 mM phthalic acid pH 4.5 (A).

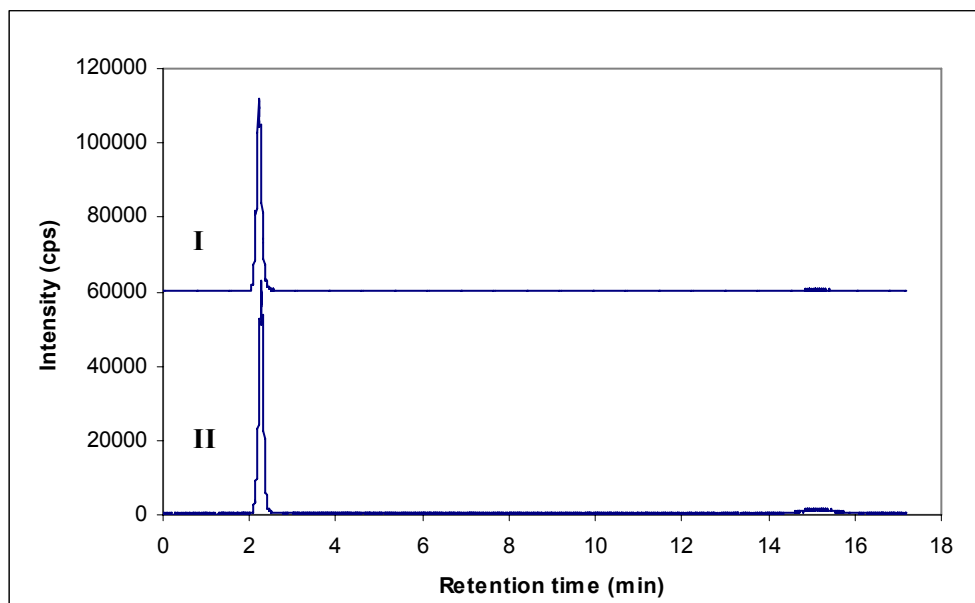

Figure iii: HPLC-ICP-MS chromatogram of Sb(V)-adenosine mixture 2 h after dilution in (I) the mobile phase or (II) in 1 M HCl + 100 mM citric acid + 30 mM EDTA. Mobile phase: 100 mM citrate pH 4.5 (B).

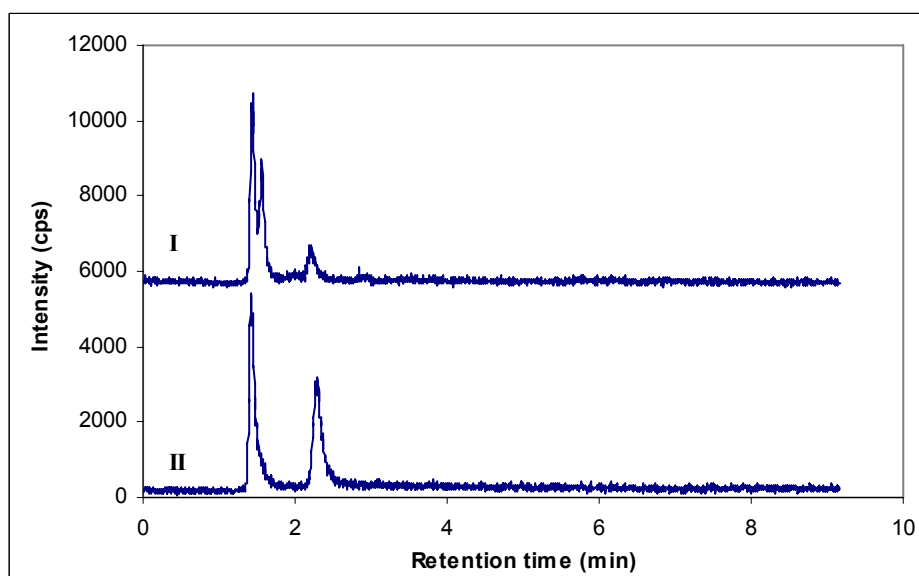

Figure iv: HPLC-ICP-MS chromatogram of a cell extract diluted in (I) the mobile phase (3 h prior to injection; recovery 66.0 ( $\pm$ 2.0)%) or (II) in 1 M HCl and 30 mM EDTA (3 ½ h prior to injection; recovery 93.5 ( $\pm$ 5.1)%). Mobile phase: 20 mM EDTA and 2 mM phthalic acid pH 4.5 (A).
